# Supplementary figures and images for: Identification of uPAR Variants Acting as ceRNAs in Leukaemia Cells
Source: MDPI journal article supplement (doi:10.3390/cancers14081980), 2022-04-14

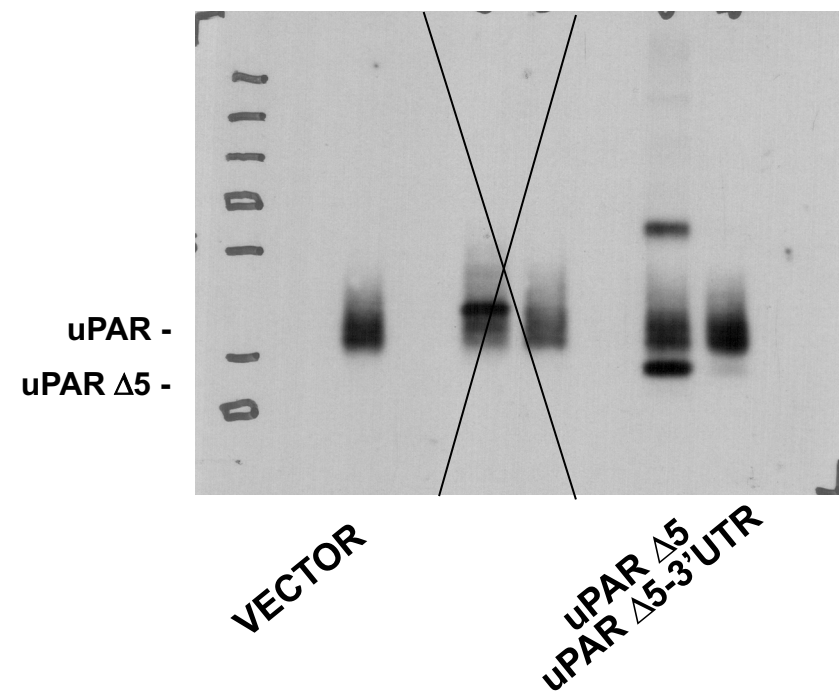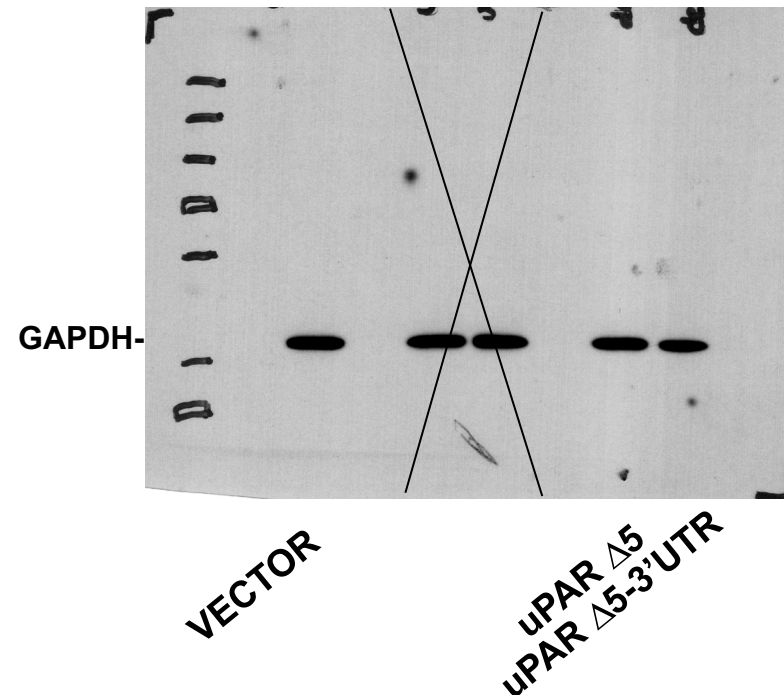

Figure S1. Original Western Blot of Figure 3.

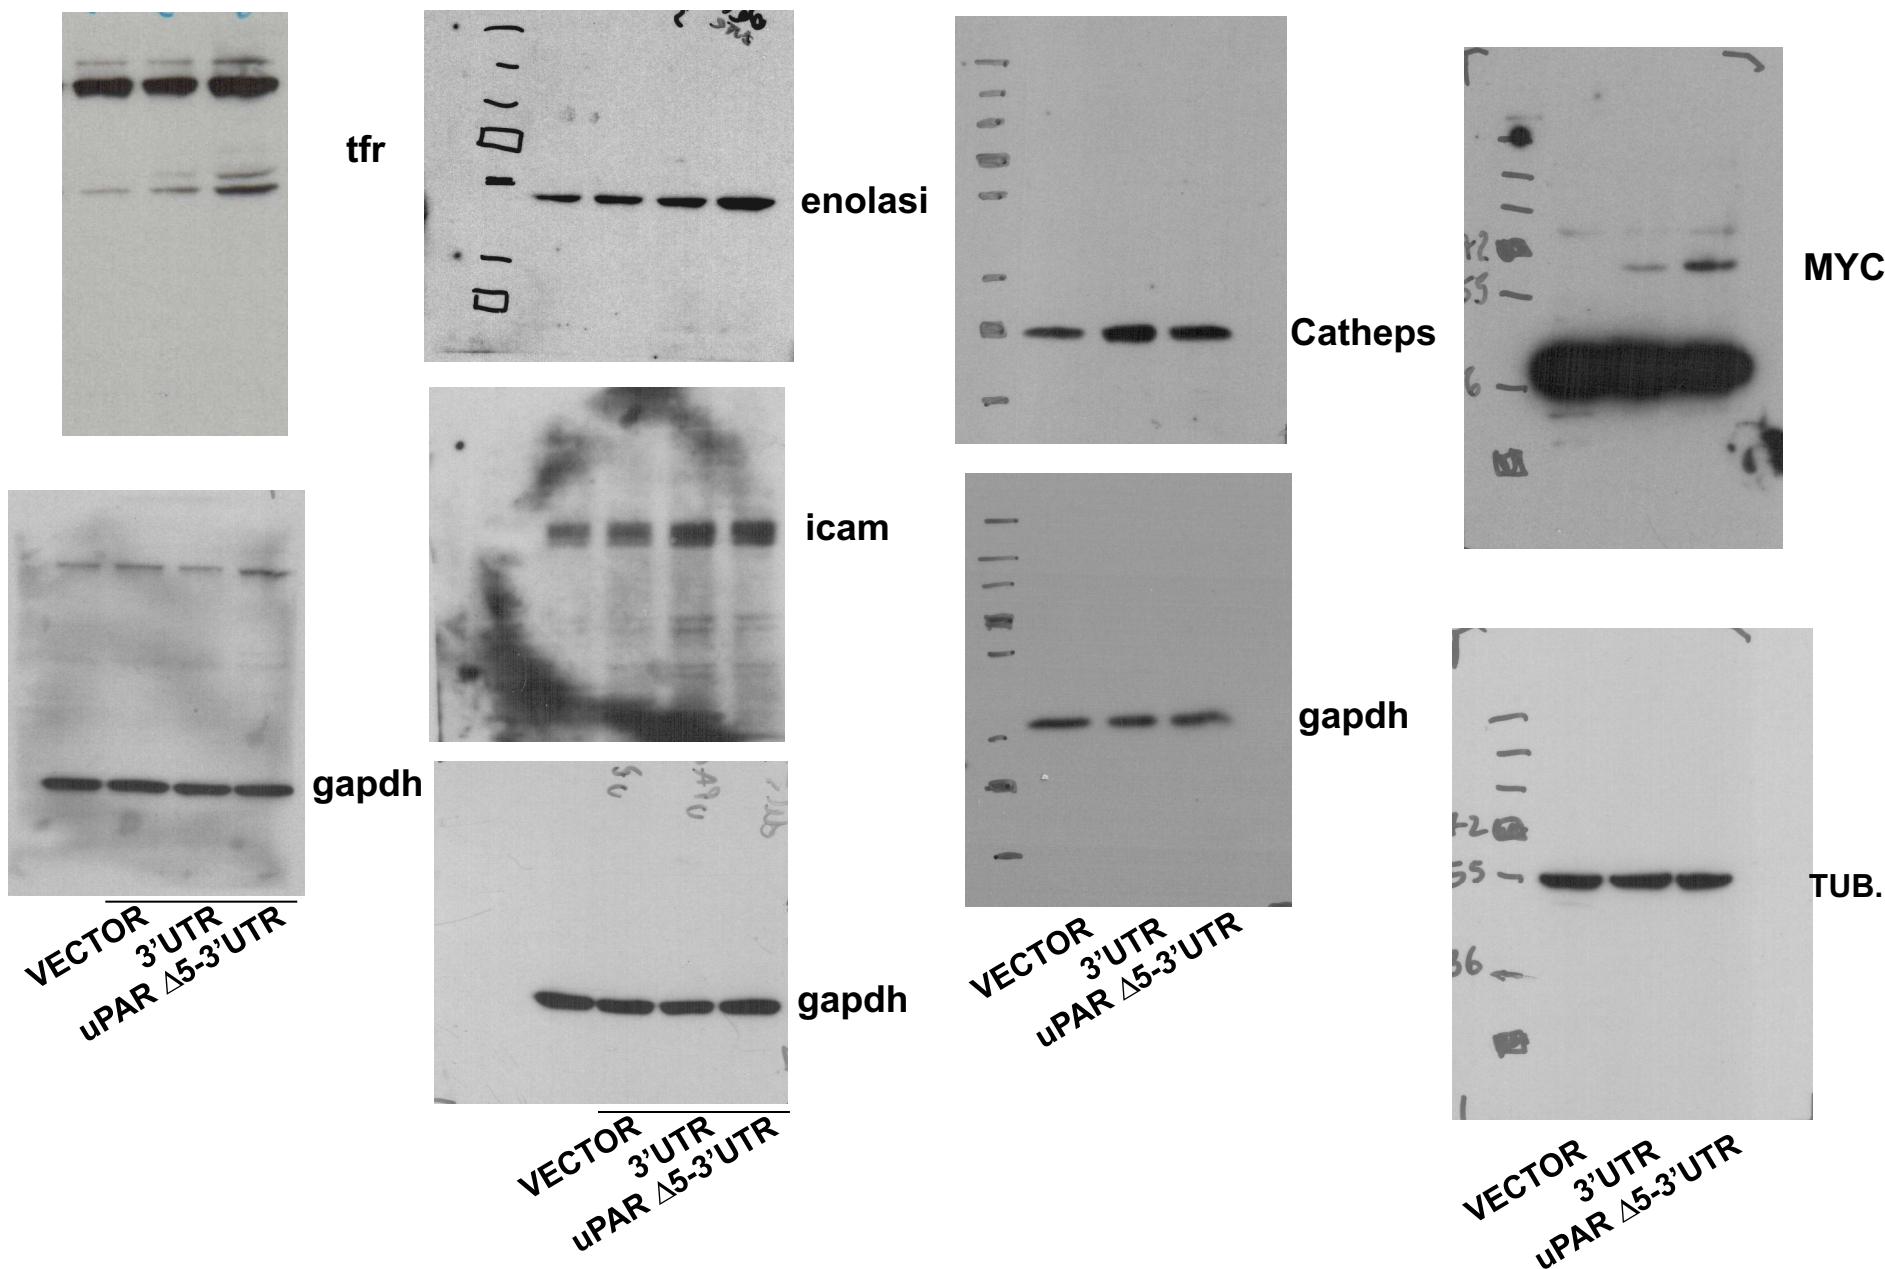

Figure S2. Original Western Blot of Figure 4A.

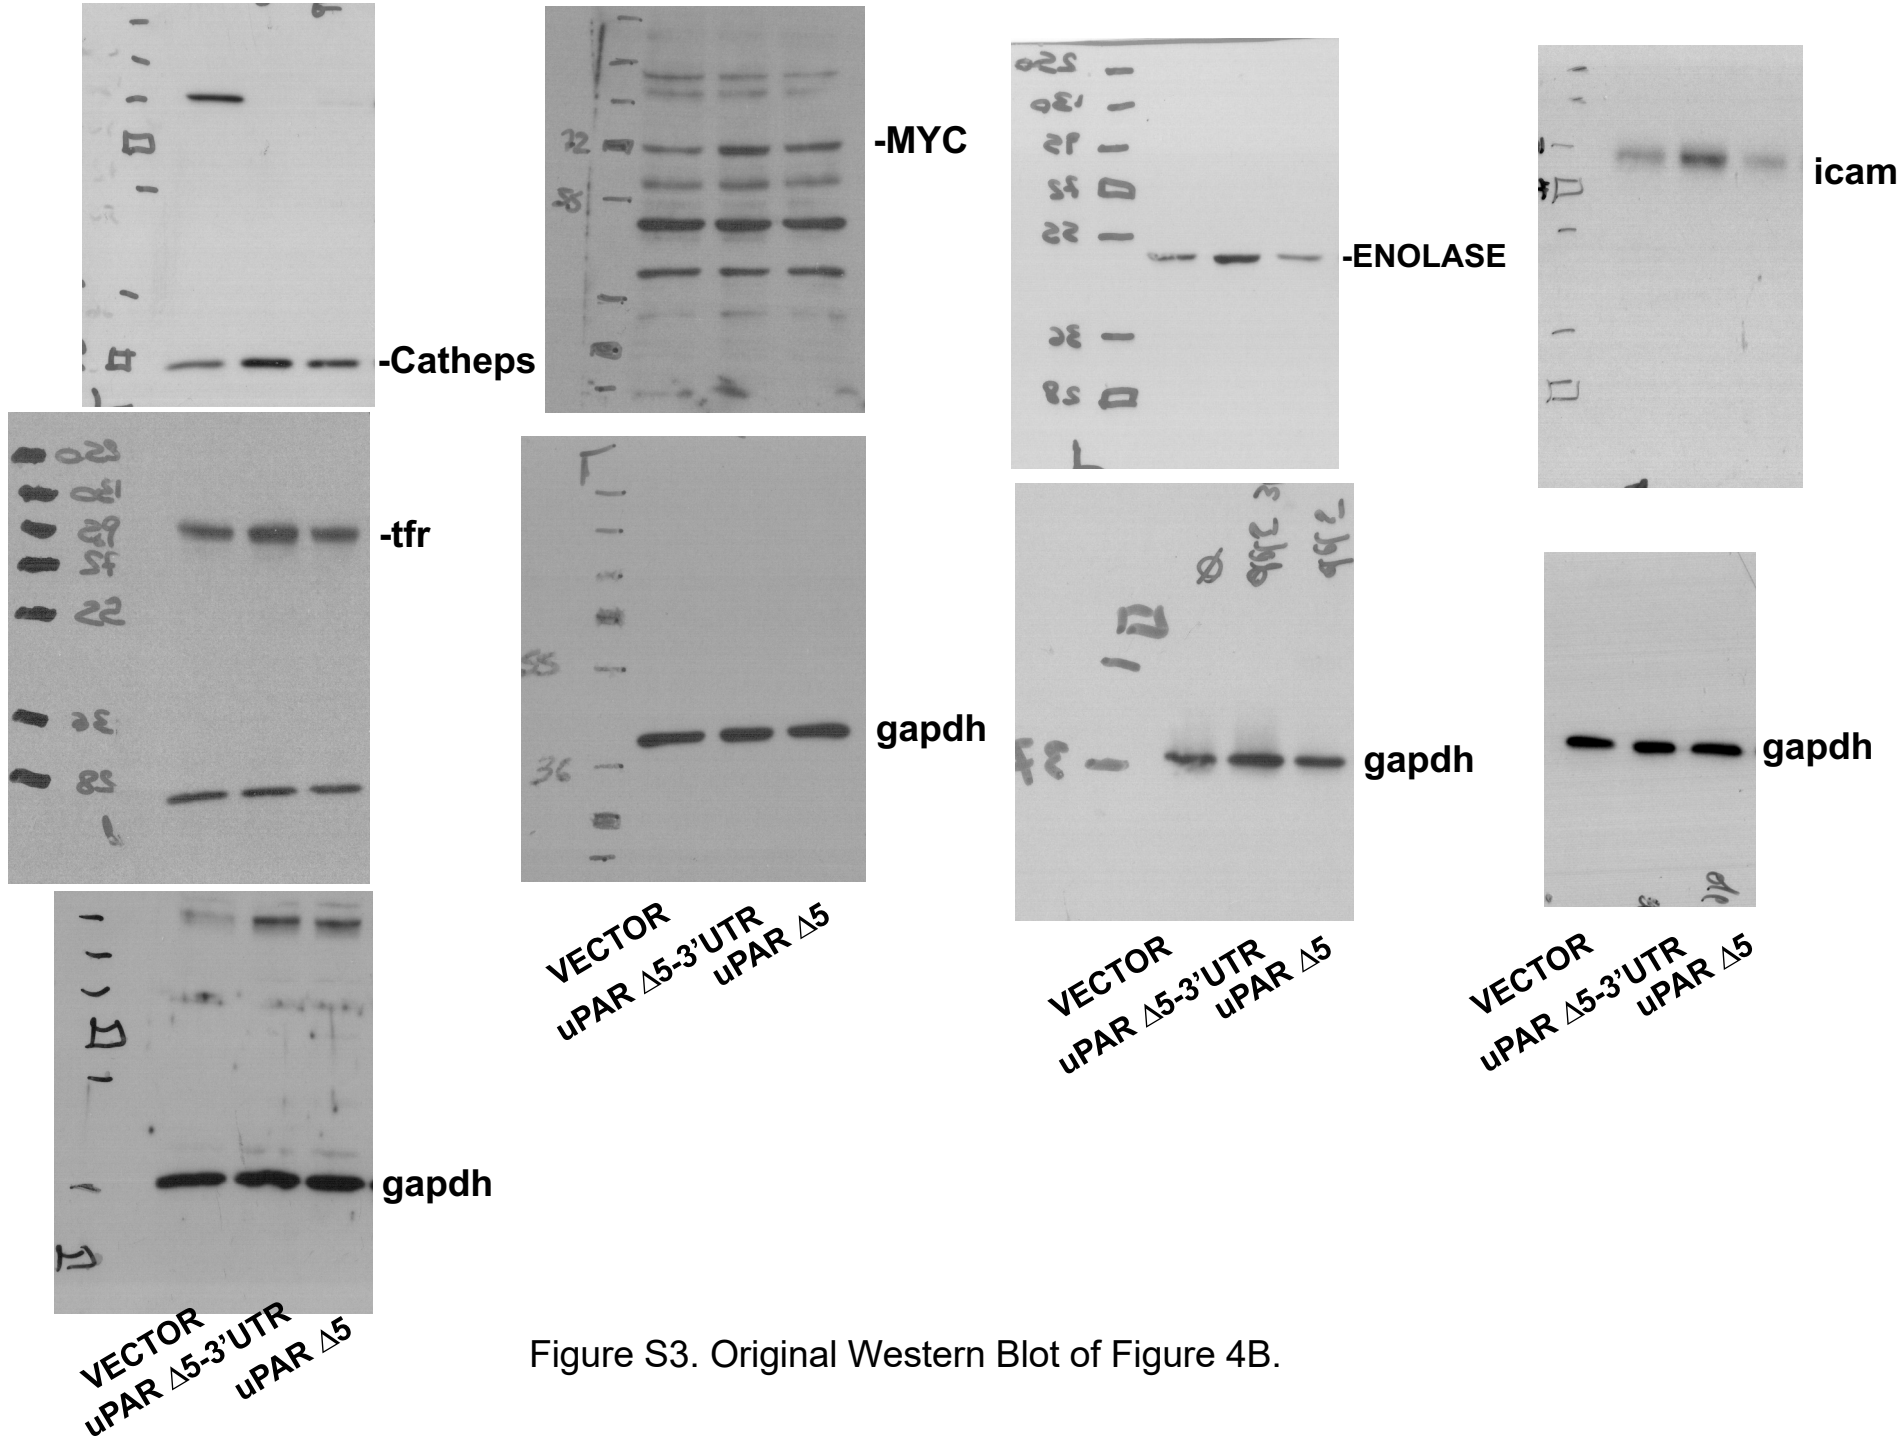

Supplement: s1 [file s1]
